# Supplementary material
Source: PubMed Central journal article supplement (PMC6325197)
Supplement: be69a47742afdc1d725e2feb54724dce_AAC.01801-18-s0001.pdf [file be69a47742afdc1d725e2feb54724dce_AAC.01801-18-s0001.pdf]

## Brief Report

### **ARGONAUT-I: Activity of cefiderocol (S-649266), a siderophore cephalosporin, against Gram-negative bacteria including carbapenem resistant nonfermenters and Enterobacteriaceae with defined extended-spectrum $\beta$ -lactamases and carbapenemases**

Michael R. Jacobs\*, MD PhD<sup>1</sup>, Ayman M. Abdelhamed, MD PhD<sup>2</sup>, Caryn E. Good, MA/MPH<sup>3</sup>, Daniel D. Rhoads, MD<sup>2</sup>, Kristine M. Hujer, BS<sup>4,5</sup>, Andrea M. Hujer, BS<sup>4,5</sup>, T. Nicholas Domitrovic, MS<sup>4,5</sup>, Susan D. Rudin, BS<sup>4,5</sup>, Sandra S. Richter, MD<sup>6</sup>, David van Duin, MD/PhD<sup>7</sup>, Barry N. Kreiswirth, PhD<sup>8</sup>, Chris Greco, PhD<sup>9</sup>, Derrick E. Fouts, PhD<sup>9</sup>, Robert A. Bonomo, MD\*<sup>4,5,10</sup> on behalf of the Antibacterial Resistance Leadership Group (ARLG)

#### **Supplemental material**

Figure S1. Structure of cefiderocol (S-649266).

Table S1. Interpretative breakpoints used.

Figure S1. Structure of cefiderocol (S-649266)

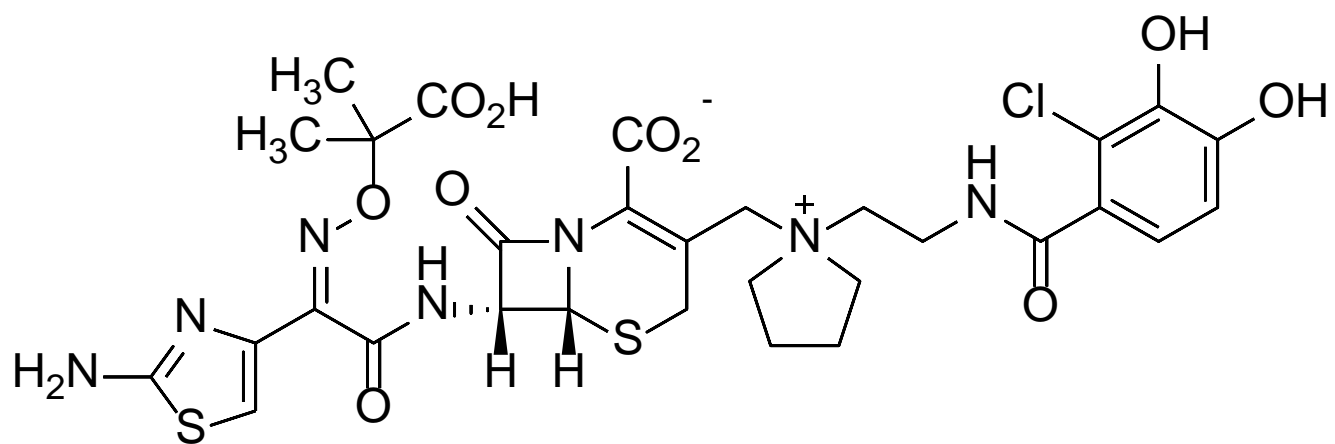

**Table S1. Interpretative breakpoints used.**

| Agent                               | Range tested (mg/L) | Interpretative breakpoints (mg/L) <sup>a,b</sup> |                           |                               |                                     |
|-------------------------------------|---------------------|--------------------------------------------------|---------------------------|-------------------------------|-------------------------------------|
|                                     |                     | Enterobacteriaceae                               | <i>Acinetobacter spp.</i> | <i>Pseudomonas aeruginosa</i> | <i>Stenotrophomonas maltophilia</i> |
| Cefiderocol                         | 0.03-64             | - <sup>c</sup>                                   | -                         | -                             | -                                   |
| Amikacin                            | 4-64                | ≤16/32/>32                                       | ≤16/32/>32                | ≤16/32/>32                    | -                                   |
| Ciprofloxacin                       | 0.24-4              | ≤1/2/>2                                          | ≤1/2/>2                   | ≤1/2/>2                       | -                                   |
| Colistin                            | 0.5-8               | ≤2/-/>2 <sup>d</sup>                             | ≤2/-/>2                   | ≤2/-/>2                       | ≤2/-/>2 <sup>d</sup>                |
| Tigecycline                         | 0.25-4              | ≤2/4/>4 <sup>e</sup>                             | -                         | -                             | -                                   |
| Aztreonam                           | 0.5-32              | ≤4/8/>8                                          | -                         | ≤8/16/>16                     | -                                   |
| Ceftolozane-tazobactam <sup>f</sup> | 0.03-64             | ≤2/4/>4                                          | -                         | ≤4/8/>8                       | -                                   |
| Cefepime                            | 0.5-16              | ≤2/4-8 <sup>g</sup> />8                          | -                         | ≤8/16/>16                     | -                                   |
| Ceftazidime                         | 0.03-64             | ≤4/8/>8                                          | ≤8/16/>16                 | ≤8/16/>16                     | ≤8/16/>16                           |
| Ceftazidime-avibactam <sup>f</sup>  | 0.03-64             | ≤8/-/>8                                          | ≤8/-/>8 <sup>d</sup>      | ≤8/-/>8                       | ≤8/-/> 8 <sup>d</sup>               |
| Meropenem                           | 0.03-64             | ≤1/2/>2                                          | ≤2/4/>4                   | ≤2/4/>4                       | -                                   |

<sup>a</sup> Breakpoints shown as susceptible/intermediate/resistant values unless otherwise indicated

<sup>b</sup> CLSI breakpoints (1) shown unless otherwise indicated

<sup>c</sup> -, no interpretative breakpoints available; provisional susceptible breakpoint of ≤4 mg/L used for cefiderocol

<sup>d</sup> Breakpoint for *P. aeruginosa* used

<sup>e</sup> FDA breakpoint

<sup>f</sup> Tazobactam and avibactam tested in fixed concentration of 4 mg/L with ceftolozane and ceftazidime, respectively

<sup>g</sup> Susceptible, dose-dependent

## **References**

1. Clinical and Laboratory Standards Institute. 2018. M100-S28. Performance Standards for Antimicrobial Susceptibility Testing, 28th Edition. Clinical and Laboratory Standards Institute, Wayne, PA.
